# Supplementary material
Source: publisher site journal article supplement (https://www.dovepress.com/article/262303)
Supplement: Supplementary file 1 [file get_supplementary_file.php]

**Supplemental Data**

Table S1. Excluded from Analysis – Formalin (* absent interphase)

| ICI204448 mid-dose (3 mg/kg) |  | | | | | | | |
| --- | --- | --- | --- | --- | --- | --- | --- | --- |
| animal number | 2 | 8* | 21 | 27 | 33 | 39 | 45 | 51 |
| Measurement bins (min.) | time spent in pain behaviors | | | | | | | |
| 0-5 | 26 | 37 | 11 | 28 | 44 | 29 | 27 | 37 |
| 20-25 | 0 | 40 | 0 | 0 | 0 | 0 | 0 | 0 |
| 25-30 | 8 | 59 | 0 | 0 | 0 | 29 | 27 | 37 |
| 30-35 | 20 | 80 | 1 | 21 | 0 | 55 | 0 | 91 |
|  |  |  |  |  |  |  |  |  |
| CAV10001 mid-dose (3 mg/kg) |  | | | | | | | |
| animal number | 5* | 11 | 17* | 23* | 29 | 42* | 48 | 54 |
| Measurement bins (min.) | time spent in pain behaviors | | | | | | | |
| 0-5 | 52 | 52 | 30 | 52 | 19 | 36 | 31 | 30 |
| 20-25 | 13 | 0 | 63 | 54 | 0 | 26 | 0 | 3 |
| 25-30 | 13 | 48 | 51 | 85 | 0 | 60 | 0 | 12 |
| 30-35 | 46 | 13 | 175 | 76 | 0 | 23 | 0 | 26 |

Table S2. Bone Cancer (MMRT-1): Underpowered groups
